# Supplementary material for: Taxonomic and functional nematode diversity in Maldivian coral degradation zones: patterns across reef typologies and depths
Source: PeerJ. 2022 Jun 30;10:e13644. doi: 10.7717/peerj.13644 (PMC9250765; doi:10.7717/peerj.13644)
Supplement: Supplemental Information 1 [file peerj-10-13644-s001.xlsx]

## Sheet: Supplemental Table S1
Table S1 Electronic Supplementary Material. Study stations: location, atoll, depth, geographic coordinates and inclination of each station.
Station	Atoll	Location	Coordinates	Exposure	Depth	Inclination	sand	silt	clay
					(m)
M1	North Malé	Vale Falhu	4°19.764'N 73°24.009'E	Lagoon reef	40	10°	48	50	2
M2	North Malé	Vale Falhu	4°19.764'N 73°24.009'E	Lagoon reef	22	50°	40	58	2
M3	North Malé	Jamal Tila	4°19.000'N 73°22.600'E	Lagoon reef	40	10°	66	32	2
M4	North Malé	Jamal Tila	4°19.000'N 73°22.600'E	Lagoon reef	19	30°	60	38	2
M5	Felidhoo	Polykey Falitu	3°36.364'N 73°30.465'E	Ocean reef	58	35°	42	56	2
M6	Felidhoo	Polykey Falitu	3°36-364'N 73°30.465'E	Ocean reef	24	80°	46	52	2
M7	South Malé	Fushitigarru Falhu	4°02.584'N 73°32.624'E	Ocean reef	47	25°	55	43	2
M8	South Malé	Fushitigarru Falhu	4°02.584'N 73°32.624'E	Ocean reef	21	55°	38	60.5	1.5
M9	Felidhoo	Masara Falhu	3°38.701'N 73°21.474'E	Ocean reef	62.7	30°	68	30	2
M10	Felidhoo	Masara Falhu	3°38.701'N 73°21.474'E	Ocean reef	25	70°	20	72.5	7.5
M11	Felidhoo	Ablogaa	3°36.387'N 73°26.877'E	Lagoon reef	37	10°	63	35	2
M12	Felidhoo	Ablogaa	3°36.387'N 73°26.877'E	Lagoon reef	25	50°	51.5	45.5	3
M13	Felidhoo	Giulia Falhu	3°37.466'N 73°27.154'E	Lagoon reef	35	10°	48.3	49.2	2.5
M14	Felidhoo	Giulia Falhu	3°37.466'N 73°27.154'E	Lagoon reef	21	50°	70	28.7	1.3
M15	Felidhoo	Kudadgharu Falhu	3°34.288'N 73°30.417'E	Ocean reef	65	30°	39.6	59	1.4
M16	Felidhoo	Kudadgharu Falhu	3°34.288'N 73°30.417'E	Ocean reef	20	80°-90°	43.5	54	2.5
M17	South Malé	Maadhoo Beyru	3°52.866'N 73°28.136'E	Ocean reef	66	30°	56.5	41.1	2.4
M18	South Malé	Maadhoo Beyru	3°52.866'N 73°28.136'E	Ocean reef	22	70°	43	53	4
M19	South Malé	Meio Ghiri	3°54.277'N 73°26.694'E	Lagoon reef	35	10°	52.8	45.8	1.4
M20	South Malé	Meio Ghiri	3°54.277'N 73°26.694'E	Lagoon reef	20	50°	60	38	2
