# Supplementary material for: Taxonomic and functional nematode diversity in Maldivian coral degradation zones: patterns across reef typologies and depths
Source: PeerJ. 2022 Jun 30;10:e13644. doi: 10.7717/peerj.13644 (PMC9250765; doi:10.7717/peerj.13644)
Supplement: Supplemental Information 2 [file peerj-10-13644-s002.xlsx]

## Sheet: Supplemental Table S2
Table S2 Electronic Supplementary Material. Presence/absence of families and genera along with the overall number of taxa found for sampling stations (when it was not possible to assign the specimen to a genus rank, the following indication was reported: family name and gen. 1, 2, 3 etc ..).																																Table S1 Electronic Supplementary Material. Study stations: location, atoll, depth, geographic coordinates and inclination of each station.
Family	Genus	M1	M2	M3	M4	M5	M6	M7	M8	M9	M10	M11	M12	M13	M14	M15	M16	M17	M18	M19	M20
Aegialoalaimidae	Aegialoalaimus						x	x	x			x	x		x						x
Anticomidae	Anticoma													x						x
	Odontoanticoma			x
Anoplostomatidae	Anoplostoma																x
Aponchidae	Synonchiella			x
	Synonema	x		x	x															x
Axonolaimidae	Ascolaimus				x															x
	Axonolaimus					x					x					x	x	x
	Odonthophora				x	x						x		x						x	x
	Parodontophora	x			x									x							x
Ceramonematidae	Ceramonema	x		x	x		x	x		x				x		x	x	x		x	x
	Dasynemoides	x			x									x				x		x	x
	Metadasynemella	x											x		x					x
	Metadasynemoides							x				x	x	x
	Pselionema	x		x						x		x						x
Chromadoridae	Actinonema	x		x				x				x	x	x		x	x		x	x	x
	Chromadora	x
	Chromadorella	x	x	x																x
	Chromadorina						x
	Chromadorita	x			x	x	x		x	x	x		x		x			x	x	x
	Dichromadora							x						x	x						x
	Endeolophos			x			x	x				x	x
	Euchromadora		x	x	x	x			x				x	x		x
	Graphonema					x						x	x	x	x						x
	Innocuonema				x
	Neochromadora	x			x									x
	Parapinnanema			x								x	x	x							x
	Ptycholaimellus	x	x		x		x							x	x	x	x
	Rhips			x										x						x	x
	Spilophorella	x		x	x	x	x						x	x	x	x	x	x	x		x
	Trochamus			x													x		x
	Chromadoridae gen. 1	x
	Chromadoridae gen. 2											x		x					x
	Chromadoridae gen. 3	x
Comesomatidae	Comesoma			x								x		x			x				x
	Dorylaimopsis	x
	Laimella	x			x									x			x
	Paracomesoma													x	x
	Paramesonchium	x
	Sabateria			x				x	x			x		x	x		x
	Setosabateria	x
	Comesomatidae gen. 1							x
	Comesomatidae gen. 2																x
Cyartonematidae	Cyartonema																				x
Cyatholaimidae	Acanthonchus	x
	Kraspedonema	x										x		x					x	x	x
	Longicyatholaimus			x						x		x	x	x			x	x	x	x
	Marylynnia			x
	Metacyatholaimus	x																	x	x
	Nannolaimoides																			x
	Paracyatholaimoides		x																	x
	Paracyatholaimus	x	x	x	x			x	x	x	x	x	x	x	x	x	x		x	x	x
	Paralongicyatholaimus					x
	Phyllolaimus																		x
	Pomponema			x										x						x
	Cyatholaimidae																			x
Desmodoridae	Acanthopharynx	x		x	x	x	x	x	x		x	x	x	x			x	x	x	x	x
	Adelphos			x	x															x
	Bolbonema	x					x
	Catanema				x															x
	Chromaspirinia	x		x	x			x	x			x	x	x	x		x	x	x	x	x
	Croconema	x		x	x		x	x		x		x		x			x		x	x	x
	Desmodora	x	x	x	x	x	x	x	x			x	x	x	x	x	x		x	x	x
	Desmodorella	x	x		x		x	x	x	x	x	x	x	x	x	x	x	x	x		x
	Echinodesmodora		x	x					x	x						x	x	x		x	x
	Eubostrichus			x	x						x		x	x					x	x	x
	Laxus	x		x	x							x	x	x							x
	Leptonemella			x	x								x							x	x
	Metachromadora	x											x							x
	Molgolaimus			x	x
	Onyx	x	x	x	x			x	x		x	x	x	x	x	x		x	x	x	x
	Parabostrichus			x													x				x
	Paradesmodora	x	x	x	x		x	x	x	x	x	x	x	x	x	x	x	x	x	x	x
	Pseudochromadora	x
	Pseudonchus			x
	Robbea		x								x	x								x	x
	Squanema				x															x
	Stilbonema	x		x																x	x
	Stygodesmodora							x				x		x
	Zalonema	x		x	x							x		x	x					x	x
	Desmodoridae gen. 1						x														x
	Desmodoridae gen. 2				x
Desmoscolecidae	Desmoscolex						x	x									x
	Quadricoma	x			x		x
	Tricoma	x	x			x	x	x	x				x			x	x	x	x		x
Diplopeltidae	Araeolaimus							x						x						x
	Campylaimus																			x
	Morlaixia			x	x
	Southerniella			x										x			x			x
Draconematidae	Apenodraconema							x
	Dracograllus	x	x				x	x	x	x	x		x			x	x	x	x		x
	Draconema	x			x		x	x	x						x	x					x
	Notochaetosoma							x
	Paradraconema			x			x		x	x		x	x			x	x				x
	Draconematidae						x									x				x
Enchelidiidae	Abelbolla				x		x	x	x	x	x				x		x		x	x	x
	Calyptronema																		x
	Eurystomina	x			x							x		x						x	x
	Paraeurystomina	x																		x
	Enchelididae gen. 1	x						x
Epsilonematidae	Bathyepsilonema	x
	Epsilonema	x	x	x	x		x	x	x	x		x	x	x			x		x
	Metepsilonema				x
Ethmolaimidae	Ethmolaimus											x
	Gomphionema				x
Haliplectidae	Haliplectus			x
Ironidae	Thalassironus	x												x						x	x
Leptolaimidae	Alaimella				x										x					x	x
	Antomicron					x						x	x						x	x
	Camacolaimus					x
	Procamacolaimus				x
Leptosomatidae	Synonchus											x
Linhomoidae	Disconema						x
	Linhomoeus	x													x
	Megadesmolaimus													x
	Metalinhomoeus													x			x			x	x
	Paralinhomoeus			x						x					x	x		x		x
	Spirinia	x	x	x	x	x	x	x	x	x		x	x	x	x					x	x
	Terschellingia	x		x										x	x	x				x
	Linhomoidae gen. 1	x
Microlaimidae	Aponema			x
	Bolbolaimus																x
	Microlaimus			x	x		x	x	x	x	x	x	x				x		x	x	x
	Spirobolbolaimus											x
Monhysteridae	Diplolaimelloides																x
	Thalassomonhystera																x
Monoposthidae	Monoposthia	x		x					x		x	x	x	x						x	x
	Rhynema	x								x		x	x	x			x		x	x
Oncholaimidae	Adoncholaimus	x										x
	Filoncholaimus			x
	Meyersia	x
	Metoncholaimus	x
	Oncholaimellus				x			x				x	x	x						x	x
	Oncholaimus	x							x											x
	Viscosia	x	x	x	x		x	x				x	x	x	x	x	x		x	x	x
	Oncholaimidae gen. 1	x		x
Oxystomidae	Halalaimus	x		x	x		x	x						x		x	x			x
	Nemanema																		x	x
	Oxystomina																			x
	Oxystominidae gen. 1			x
Phanodermatidae	Crenopharynx	x																	x
	Phanoderma																	x
Selachenematidae	Cheironchus	x		x								x		x	x		x
	Demonema			x																x
	Gammanema			x										x
	Halichoanolaimus	x										x		x						x
	Latronema	x				x						x								x	x
	Richtersia		x	x
	Synonchium			x
	Selachinematidae gen. 1							x
Siphonolaimidae	Astomonema			x
	Siphonolaimus																			x
Tarvaiidae	Tarvaja			x	x									x						x
Thoracostomopsidae	Enoploides											x	x
	Epacanthion											x	x	x	x				x	x	x
	Mesacanthion			x	x			x						x		x	x			x	x
	Thoracostomopsidae gen.1	x											x
Trefusiidae	Rhabdocoma																			x
Tripyloididae	Gairleanema																				x
Tubolamoididae	Tubolaimoides																			x
Xyalidae	Cobbia			x	x							x	x	x	x		x		x	x	x
	Daptonema				x	x	x		x		x			x	x	x	x			x	x
	Elzalia				x
	Linhystera				x												x
	Paramonohystera								x		x						x			x
	Promonhystera	x																		x
	Rhynchonema			x			x										x			x
	Scaptrella			x														x		x
	Stylotheristus				x												x			x
	Theristus						x	x	x		x		x		x	x	x		x	x	x
	Trichotheristus	x
	Xyala																				x
	Xyalidae gen. 1						x
Tot	173	66	17	62	52	15	32	35	25	17	16	45	38	57	29	24	45	18	32	75	53
