# Supplementary material for: Taxonomic and functional nematode diversity in Maldivian coral degradation zones: patterns across reef typologies and depths
Source: PeerJ. 2022 Jun 30;10:e13644. doi: 10.7717/peerj.13644 (PMC9250765; doi:10.7717/peerj.13644)
Supplement: Supplemental Information 3 [file peerj-10-13644-s003.xlsx]

## Sheet: Table S3
Table S3. Results of SIMPER test assessing the dissimilarities in the nematode assemblage structure between the two exposures.
Groups	Lagoon reef	vs.	Ocean reef
Average	dissimilarity	=	81.24%
Group	Lagoon reef	Ocean reef
Genera	Av.Abund	Av.Abund	Av.Diss	Diss/SD	Contrib%	Cum.%
Paradesmodora	1.57	0.95	2.37	0.93	2.91	2.91
Chromaspirinia	1.09	0.35	2.18	0.84	2.69	5.6
Microlaimus	1.01	0.74	2.07	0.94	2.54	8.14
Desmodorella	0.83	1.01	1.99	1	2.45	10.59
Acanthopharynx	0.84	0.68	1.96	0.74	2.42	13.01
Desmodora	0.97	0.65	1.94	0.8	2.39	15.4
Spirinia	0.89	0.33	1.93	0.9	2.37	17.77
Onyx	0.94	0.4	1.87	1.07	2.3	20.07
Dracograllus	0.25	0.87	1.84	0.81	2.26	22.34
Paracyatholaimus	0.69	0.53	1.77	0.77	2.18	24.51
Cobbia	0.79	0.13	1.71	0.87	2.11	26.62
Chromadorita	0.29	0.66	1.67	0.68	2.06	28.68
Viscosia	0.72	0.32	1.54	0.95	1.9	30.57
Epsilonema	0.42	0.65	1.49	0.85	1.84	32.41
Ceramonema	0.52	0.51	1.43	0.8	1.76	34.17
Spilophorella	0.54	0.43	1.43	0.79	1.76	35.93
Tricoma	0.18	0.7	1.42	0.77	1.75	37.68
Daptonema	0.33	0.49	1.37	0.59	1.68	39.36
Abelbolla	0.23	0.57	1.36	0.63	1.68	41.04
Zalonema	0.73	0	1.32	0.9	1.62	42.67
Croconema	0.59	0.27	1.29	0.77	1.59	44.26
Laxus	0.65	0	1.24	0.83	1.52	45.78
Actinonema	0.53	0.25	1.21	0.77	1.49	47.28
Longicyatholaimus	0.41	0.31	1.15	0.65	1.41	48.69
Paradraconema	0.16	0.49	1.14	0.62	1.4	50.09
