# Supplementary material for: Taxonomic and functional nematode diversity in Maldivian coral degradation zones: patterns across reef typologies and depths
Source: PeerJ. 2022 Jun 30;10:e13644. doi: 10.7717/peerj.13644 (PMC9250765; doi:10.7717/peerj.13644)
Supplement: Supplemental Information 4 [file peerj-10-13644-s004.xlsx]

## Sheet: Supplemental Table S4
Table S4. Results of SIMPER test assessing the dissimilarities in the nematode assemblage structure between depths i.e. <25m, 25-50m, >50m.
Groups	25-50m	vs	<25m
Average	dissimilarity	=	77.21%
	25-50m	<25m
Genera	Av.Abund	Av.Abund	Av.Diss	Diss/SD	Contrib%	Cum.%
Microlaimus	1.06	1.01	1.77	0.91	2.29	2.29
Chromaspirinia	1.14	0.62	1.72	1.15	2.22	4.51
Paradesmodora	1.37	1.32	1.67	0.89	2.17	6.68
Desmodorella	0.59	1.17	1.66	1.09	2.15	8.83
Acanthopharynx	1.07	0.6	1.63	1.06	2.11	10.94
Croconema	0.94	0.24	1.61	0.96	2.09	13.03
Paracyatholaimus	0.79	0.6	1.59	0.68	2.05	15.08
Desmodora	1.19	0.7	1.53	1.08	1.98	17.06
Onyx	0.9	0.64	1.52	1.06	1.97	19.03
Dracograllus	0.24	0.77	1.5	0.81	1.95	20.98
Spirinia	0.83	0.6	1.49	0.97	1.93	22.9
Zalonema	0.93	0.17	1.49	1.09	1.92	24.83
Epsilonema	0.57	0.68	1.43	0.9	1.85	26.67
Sabateria	0.63	0.24	1.38	0.55	1.79	28.46
Cobbia	0.5	0.61	1.31	0.8	1.7	30.16
Viscosia	0.65	0.58	1.26	0.98	1.64	31.8
Chromadorita	0.12	0.62	1.17	0.65	1.52	33.31
Ceramonema	0.69	0.32	1.16	1	1.5	34.82
Abelbolla	0.12	0.61	1.15	0.69	1.49	36.3
Daptonema	0.25	0.55	1.14	0.64	1.48	37.78
Actinonema	0.54	0.41	1.12	0.9	1.45	39.23
Spilophorella	0.45	0.46	1.07	0.84	1.39	40.62
Longicyatholaimus	0.55	0.26	1.03	0.81	1.34	41.96
Halalaimus	0.48	0.3	0.97	0.83	1.26	43.22
Laxus	0.4	0.41	0.96	0.84	1.25	44.47
Tricoma	0.21	0.5	0.96	0.78	1.24	45.72
Rhynema	0.56	0.12	0.9	0.88	1.17	46.88
Epacanthion	0.38	0.28	0.85	0.76	1.09	47.98
Theristus	0.14	0.47	0.84	0.76	1.09	49.07
Monoposthia	0.44	0.18	0.84	0.78	1.09	50.16
Groups	25-50m	vs	>50m
Average	dissimilarity	=	85.68%
	25-50m	>50m
Genera	Av.Abund	Av.Abund	Av.Diss	Diss/SD	Contrib%	Cum.%
Desmodora	1.19	0.52	2.36	1.12	2.75	2.75
Acanthopharynx	1.07	0.71	2.31	1	2.7	5.45
Microlaimus	1.06	0.28	2.28	0.96	2.67	8.11
Chromaspirinia	1.14	0.35	2.28	1.08	2.66	10.78
Paradesmodora	1.37	0.94	2.14	1.03	2.5	13.28
Paracyatholaimus	0.79	0.37	2.08	0.74	2.43	15.71
Croconema	0.94	0.12	1.99	0.99	2.32	18.03
Spirinia	0.83	0.3	1.86	1.04	2.17	20.2
Desmodorella	0.59	0.78	1.85	0.92	2.16	22.36
Ceramonema	0.69	0.75	1.84	0.97	2.15	24.51
Zalonema	0.93	0	1.74	1.11	2.04	26.54
Onyx	0.9	0.39	1.73	1.16	2.01	28.56
Sabateria	0.63	0	1.57	0.52	1.84	30.39
Spilophorella	0.45	0.58	1.48	0.82	1.73	32.12
Chromadorita	0.12	0.64	1.46	0.66	1.7	33.83
Tricoma	0.21	0.6	1.43	0.72	1.67	35.5
Longicyatholaimus	0.55	0.33	1.4	0.77	1.63	37.13
Epsilonema	0.57	0.12	1.4	0.75	1.63	38.76
Viscosia	0.65	0.16	1.33	0.95	1.55	40.31
Dracograllus	0.24	0.53	1.23	0.76	1.43	41.74
Rhynema	0.56	0.17	1.21	0.78	1.42	43.16
Euchromadora	0.16	0.38	1.13	0.45	1.32	44.48
Cobbia	0.5	0	1.13	0.57	1.32	45.8
Paradraconema	0.13	0.45	1.11	0.6	1.29	47.09
Halalaimus	0.48	0.14	1.07	0.78	1.25	48.34
Actinonema	0.54	0.12	1.05	0.89	1.23	49.57
Echinodesmodora	0.13	0.45	0.99	0.62	1.16	50.73
Groups	<25m	vs	>50m
Average	dissimilarity	=	82.23%
	<25m	>50m
Genera	Av.Abund	Av.Abund	Av.Diss	Diss/SD	Contrib%	Cum.%
Paradesmodora	1.32	0.94	3.13	0.95	3.81	3.81
Desmodorella	1.17	0.78	2.95	1.07	3.59	7.4
Acanthopharynx	0.6	0.71	2.79	0.68	3.39	10.79
Chromadorita	0.62	0.64	2.65	0.77	3.22	14.02
Microlaimus	1.01	0.28	2.64	0.98	3.21	17.23
Dracograllus	0.77	0.53	2.54	0.83	3.09	20.31
Desmodora	0.7	0.52	2.54	0.66	3.09	23.4
Chromaspirinia	0.62	0.35	2.33	0.57	2.83	26.24
Ceramonema	0.32	0.75	2.26	0.82	2.75	28.98
Paracyatholaimus	0.6	0.37	2.2	0.75	2.68	31.66
Tricoma	0.5	0.6	2.15	0.79	2.62	34.28
Abelbolla	0.61	0.28	2.08	0.7	2.53	36.8
Spilophorella	0.46	0.58	2.05	0.79	2.49	39.3
Daptonema	0.55	0.3	2.04	0.64	2.48	41.78
Onyx	0.64	0.39	1.96	0.8	2.39	44.16
Spirinia	0.6	0.3	1.96	0.74	2.39	46.55
Paradraconema	0.39	0.45	1.84	0.68	2.23	48.78
Epsilonema	0.68	0.12	1.75	0.81	2.13	50.92
