# Supplementary material for: Taxonomic and functional nematode diversity in Maldivian coral degradation zones: patterns across reef typologies and depths
Source: PeerJ. 2022 Jun 30;10:e13644. doi: 10.7717/peerj.13644 (PMC9250765; doi:10.7717/peerj.13644)
Supplement: Supplemental Information 5 [file peerj-10-13644-s005.xlsx]

## Sheet: Supplemental Table S5
Table S5. Results of SIMPER test assessing the dissimilarities in the nematode assemblage structure between slope inclinations.
Groups	<10°	vs	>50°
Average	dissimilarity	=	78.1%
	<10°	>50°
Genera	Av.Abund	Av.Abund	Av.Diss	Diss/SD	Contrib%	Cum.%
Chromaspirinia	1.27	0.48	1.81	1.42	2.32	2.32
Zalonema	1.12	0.09	1.79	1.33	2.29	4.61
Croconema	1.04	0.23	1.77	1	2.27	6.88
Microlaimus	0.99	0.92	1.63	0.92	2.08	8.97
Acanthopharynx	1.09	0.52	1.62	1.17	2.08	11.04
Desmodorella	0.58	1.21	1.55	1.19	1.99	13.03
Paradesmodora	1.52	1.28	1.54	0.99	1.97	15
Onyx	0.99	0.6	1.54	1.19	1.97	16.97
Dracograllus	0.07	0.86	1.47	0.89	1.89	18.86
Spirinia	0.84	0.49	1.47	0.98	1.88	20.74
Desmodora	1.23	0.73	1.47	1.11	1.88	22.62
Cobbia	0.6	0.56	1.36	0.8	1.74	24.35
Epsilonema	0.48	0.67	1.35	0.88	1.72	26.07
Paracyatholaimus	0.78	0.61	1.3	1.15	1.66	27.74
Viscosia	0.68	0.48	1.2	1.04	1.53	29.27
Ceramonema	0.73	0.26	1.19	1.04	1.52	30.79
Longicyatholaimus	0.66	0.29	1.15	0.93	1.47	32.26
Actinonema	0.57	0.46	1.13	0.98	1.44	33.7
Chromadorita	0.14	0.6	1.11	0.68	1.42	35.12
Spilophorella	0.54	0.43	1.09	0.9	1.4	36.52
Daptonema	0.3	0.53	1.09	0.71	1.39	37.92
Sabateria	0.59	0.27	1.06	0.87	1.36	39.27
Rhynema	0.67	0.13	1.06	1.01	1.36	40.63
Abelbolla	0.07	0.6	1.05	0.7	1.35	41.98
Laxus	0.49	0.29	0.95	0.89	1.22	43.2
Monoposthia	0.52	0.2	0.95	0.92	1.22	44.42
Kraspedonema	0.59	0.12	0.94	1.02	1.21	45.62
Cheironchus	0.56	0.1	0.93	0.91	1.19	46.81
Epacanthion	0.45	0.31	0.92	0.88	1.18	47.99
Halalaimus	0.47	0.25	0.9	0.87	1.15	49.14
Tricoma	0.09	0.56	0.88	0.79	1.13	50.27
Groups	<10°	vs	10-50°
Average	dissimilarity	=	81.33%
	<10°	10-50°
Genera	Av.Abund	Av.Abund	Av.Diss	Diss/SD	Contrib%	Cum.%
Chromaspirinia	1.27	0.62	1.96	1.29	2.41	2.41
Croconema	1.04	0.22	1.92	1	2.36	4.77
Desmodora	1.23	0.58	1.9	1.24	2.34	7.11
Zalonema	1.12	0.14	1.89	1.31	2.32	9.43
Microlaimus	0.99	0.71	1.88	0.93	2.31	11.74
Acanthopharynx	1.09	0.85	1.79	1.07	2.21	13.95
Paradesmodora	1.52	1.01	1.77	1.07	2.18	16.13
Paracyatholaimus	0.78	0.47	1.62	1.07	2	18.12
Spirinia	0.84	0.59	1.57	0.98	1.93	20.05
Onyx	0.99	0.49	1.55	1.21	1.91	21.96
Ceramonema	0.73	0.71	1.5	1.04	1.85	23.81
Desmodorella	0.58	0.76	1.49	1.01	1.83	25.64
Longicyatholaimus	0.66	0.22	1.29	0.89	1.59	27.24
Viscosia	0.68	0.44	1.28	1.06	1.57	28.81
Spilophorella	0.54	0.52	1.26	0.9	1.56	30.37
Cobbia	0.6	0.18	1.26	0.66	1.55	31.91
Rhynema	0.67	0.11	1.21	0.97	1.48	33.4
Epsilonema	0.48	0.37	1.19	0.73	1.46	34.86
Sabateria	0.59	0.13	1.17	0.75	1.44	36.3
Chromadorita	0.14	0.56	1.09	0.66	1.33	37.63
Tricoma	0.09	0.54	1.02	0.66	1.26	38.89
Kraspedonema	0.59	0	0.99	1.01	1.22	40.11
Actinonema	0.57	0.15	0.99	0.92	1.21	41.32
Halalaimus	0.47	0.3	0.98	0.89	1.2	42.52
Laxus	0.49	0.24	0.95	0.88	1.17	43.69
Cheironchus	0.56	0	0.94	0.9	1.16	44.85
Dracograllus	0.07	0.53	0.91	0.72	1.12	45.97
Monoposthia	0.52	0	0.91	0.88	1.12	47.09
Mesacanthion	0.37	0.38	0.91	0.79	1.12	48.21
Oncholaimellus	0.44	0.28	0.9	0.82	1.1	49.32
Latronema	0.45	0.1	0.88	0.68	1.08	50.4
Groups	>50°	vs	10-50°
Average	dissimilarity	=	80.21%
	>50°	10-50°
Genera	Av.Abund	Av.Abund	Av.Diss	Diss/SD	Contrib%	Cum.%
Paradesmodora	1.28	1.01	2.9	0.92	3.61	3.61
Desmodorella	1.21	0.76	2.72	1.03	3.4	7.01
Acanthopharynx	0.52	0.85	2.53	0.68	3.15	10.15
Microlaimus	0.92	0.71	2.49	0.94	3.1	13.26
Dracograllus	0.86	0.53	2.47	0.85	3.08	16.33
Chromadorita	0.6	0.56	2.35	0.73	2.92	19.26
Desmodora	0.73	0.58	2.31	0.67	2.88	22.13
Paracyatholaimus	0.61	0.47	2.29	0.69	2.85	24.98
Chromaspirinia	0.48	0.62	2.18	0.59	2.72	27.7
Tricoma	0.56	0.54	1.95	0.79	2.43	30.13
Ceramonema	0.26	0.71	1.94	0.77	2.42	32.55
Abelbolla	0.6	0.37	1.94	0.7	2.42	34.98
Spirinia	0.49	0.59	1.9	0.78	2.37	37.34
Daptonema	0.53	0.33	1.88	0.62	2.34	39.68
Onyx	0.6	0.49	1.87	0.81	2.33	42.02
Spilophorella	0.43	0.52	1.78	0.74	2.22	44.24
Epsilonema	0.67	0.37	1.78	0.86	2.22	46.46
Viscosia	0.48	0.44	1.59	0.79	1.98	48.44
Paradraconema	0.43	0.3	1.57	0.63	1.96	50.4
